# Supplementary material
Source: PubMed Central journal article supplement (PMC5175445)
Supplement: Supp_Table1.pdf [file Supp_Table1.pdf]

SUPPLEMENTARY TABLE S1. QUANTITATIVE REAL-TIME POLYMERASE  
CHAIN REACTION GENES AND PRIMER SEQUENCES

| <i>Gene</i>  | <i>Forward (5'–3')</i>      | <i>Reverse (5'–3')</i> |
|--------------|-----------------------------|------------------------|
| <i>Actb</i>  | GAGCAAGAGAGGTATCCTGAC       | TTCATGGATGCCACAGGA TTC |
| <i>Bsp</i>   | CCGGCCACGCTACTTTCTT         | TGGACTGGAAACCGTTTCAGA  |
| <i>Col 1</i> | GAACCAGCCGATGATGCTAACGTGGTC | GGCTGCGGATGTTCTCAATCT  |
| <i>Ocn</i>   | CCTGAGTCTGACAAAGCCTTCA      | GCCGGAGTCTGTTCACTACCTT |
| <i>Opn</i>   | GACCATGAGATTGGCAGTGATTTG    | TGATGTTCCAGGCTGGCTTTG  |
| <i>On</i>    | GTCCCACTGAGCTGGC            | AAGCACAGAGTCTGGGTGAGT  |
